# Supplementary material for: Mapping the planet’s critical natural assets
Source: PubMed Central journal article supplement (PMC9834042; doi:10.1038/s41559-022-01934-5), 2022-11-28
Supplement: 41559_2022_1934_MOESM2_ESM.pdf [file 41559_2022_1934_MOESM2_ESM.pdf]

## Reporting Summary

Nature Portfolio wishes to improve the reproducibility of the work that we publish. This form provides structure for consistency and transparency in reporting. For further information on Nature Portfolio policies, see our [Editorial Policies](#) and the [Editorial Policy Checklist](#).

### Statistics

For all statistical analyses, confirm that the following items are present in the figure legend, table legend, main text, or Methods section.

n/a Confirmed

- The exact sample size ( $n$ ) for each experimental group/condition, given as a discrete number and unit of measurement
- A statement on whether measurements were taken from distinct samples or whether the same sample was measured repeatedly
- The statistical test(s) used AND whether they are one- or two-sided  
*Only common tests should be described solely by name; describe more complex techniques in the Methods section.*
- A description of all covariates tested
- A description of any assumptions or corrections, such as tests of normality and adjustment for multiple comparisons
- A full description of the statistical parameters including central tendency (e.g. means) or other basic estimates (e.g. regression coefficient) AND variation (e.g. standard deviation) or associated estimates of uncertainty (e.g. confidence intervals)
- For null hypothesis testing, the test statistic (e.g.  $F$ ,  $t$ ,  $r$ ) with confidence intervals, effect sizes, degrees of freedom and  $P$  value noted  
*Give  $P$  values as exact values whenever suitable.*
- For Bayesian analysis, information on the choice of priors and Markov chain Monte Carlo settings
- For hierarchical and complex designs, identification of the appropriate level for tests and full reporting of outcomes
- Estimates of effect sizes (e.g. Cohen's  $d$ , Pearson's  $r$ ), indicating how they were calculated

*Our web collection on [statistics for biologists](#) contains articles on many of the points above.*

### Software and code

Policy information about [availability of computer code](#)

Data collection

We used InVEST version 3.8 (free and open-source, available at [naturalcapitalproject.stanford.edu/software/invest](https://naturalcapitalproject.stanford.edu/software/invest)) and Co\$tingNature version 3 (free for non-commercial uses, available at [www.policysupport.org/costingnature](http://www.policysupport.org/costingnature)), along with several open-source pre-published datasets.

Data analysis

We used prioritizr available at <https://prioritizr.net/>

For manuscripts utilizing custom algorithms or software that are central to the research but not yet described in published literature, software must be made available to editors and reviewers. We strongly encourage code deposition in a community repository (e.g. GitHub). See the Nature Portfolio [guidelines for submitting code & software](#) for further information.

### Data

Policy information about [availability of data](#)

All manuscripts must include a [data availability statement](#). This statement should provide the following information, where applicable:

- Accession codes, unique identifiers, or web links for publicly available datasets
- A description of any restrictions on data availability
- For clinical datasets or third party data, please ensure that the statement adheres to our [policy](#)

All data and code to run it are available at: [https://osf.io/r5xz7/?view\\_only=d611a688525f4ceb8db4ef4e7528b0e8](https://osf.io/r5xz7/?view_only=d611a688525f4ceb8db4ef4e7528b0e8)

## Field-specific reporting

Please select the one below that is the best fit for your research. If you are not sure, read the appropriate sections before making your selection.

Life sciences       Behavioural & social sciences       Ecological, evolutionary & environmental sciences

For a reference copy of the document with all sections, see [nature.com/documents/nr-reporting-summary-flat.pdf](https://www.nature.com/documents/nr-reporting-summary-flat.pdf)

## Ecological, evolutionary & environmental sciences study design

All studies must disclose on these points even when the disclosure is negative.

|                                   |                                                                                                                                                                                                         |
|-----------------------------------|---------------------------------------------------------------------------------------------------------------------------------------------------------------------------------------------------------|
| Study description                 | We ran spatially explicit models of nature's contributions to people and integrated their outputs along with pre-existing datasets into a multi-objective optimization.                                 |
| Research sample                   | Spatially-explicit GIS data                                                                                                                                                                             |
| Sampling strategy                 | Data were resampled from 300 m resolution to 2 km resolution to include in the spatial optimization; otherwise no sub-sampling was performed.                                                           |
| Data collection                   | Data were provided by coauthors Chaplin-Kramer, Sharp, Mulligan, McIntyre, Spalding, Watson, Keys, and Roehrdanz. Methods to produce each spatial dataset are detailed in the Supplementary Information |
| Timing and spatial scale          | Data are mostly from 2015, but span the 2000-2017 window (annual/snapshot), and are global in extent.                                                                                                   |
| Data exclusions                   | No data were excluded                                                                                                                                                                                   |
| Reproducibility                   | Code is published to allow reproducibility                                                                                                                                                              |
| Randomization                     | Randomization is not necessary because all data are included in the optimization                                                                                                                        |
| Blinding                          | Blinding is not relevant because all data are included in the optimization                                                                                                                              |
| Did the study involve field work? | <input type="checkbox"/> Yes <input checked="" type="checkbox"/> No                                                                                                                                     |

## Reporting for specific materials, systems and methods

We require information from authors about some types of materials, experimental systems and methods used in many studies. Here, indicate whether each material, system or method listed is relevant to your study. If you are not sure if a list item applies to your research, read the appropriate section before selecting a response.

### Materials & experimental systems

| n/a                                 | Involved in the study                                  |
|-------------------------------------|--------------------------------------------------------|
| <input checked="" type="checkbox"/> | <input type="checkbox"/> Antibodies                    |
| <input checked="" type="checkbox"/> | <input type="checkbox"/> Eukaryotic cell lines         |
| <input checked="" type="checkbox"/> | <input type="checkbox"/> Palaeontology and archaeology |
| <input checked="" type="checkbox"/> | <input type="checkbox"/> Animals and other organisms   |
| <input checked="" type="checkbox"/> | <input type="checkbox"/> Human research participants   |
| <input checked="" type="checkbox"/> | <input type="checkbox"/> Clinical data                 |
| <input checked="" type="checkbox"/> | <input type="checkbox"/> Dual use research of concern  |

### Methods

| n/a                                 | Involved in the study                           |
|-------------------------------------|-------------------------------------------------|
| <input checked="" type="checkbox"/> | <input type="checkbox"/> ChIP-seq               |
| <input checked="" type="checkbox"/> | <input type="checkbox"/> Flow cytometry         |
| <input checked="" type="checkbox"/> | <input type="checkbox"/> MRI-based neuroimaging |
